# Supplementary material for: Aldehyde Dehydrogenase Gene Superfamily in Populus: Organization and Expression Divergence between Paralogous Gene Pairs
Source: PubMed Central journal article supplement (PMC4409362; doi:10.1371/journal.pone.0124669), 2015-04-24

**Probe sets of *PtALDH2B4*:**

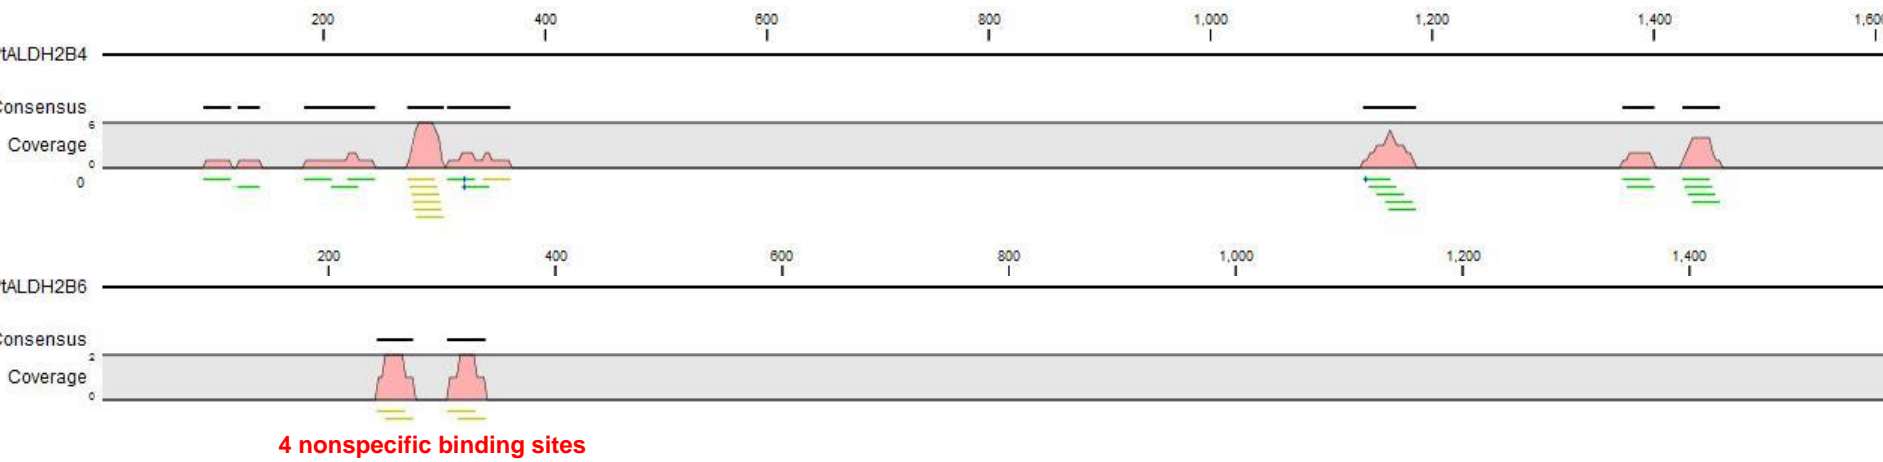

**Probe sets of *PtALDH2B6*:**

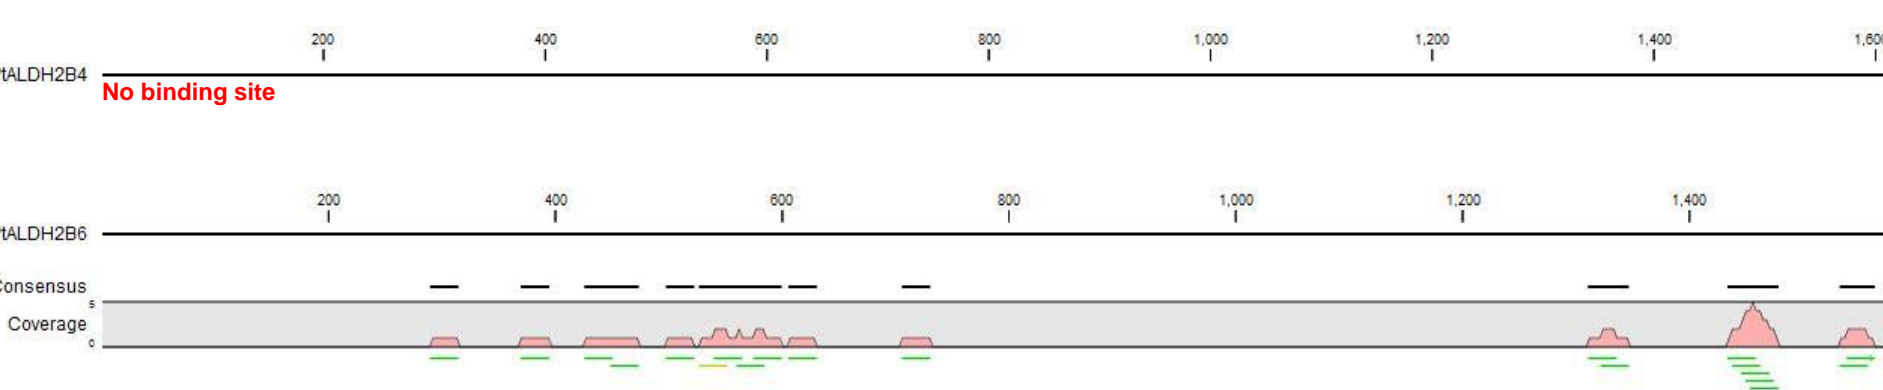

**Probe sets of *PtALDH3H1*:**

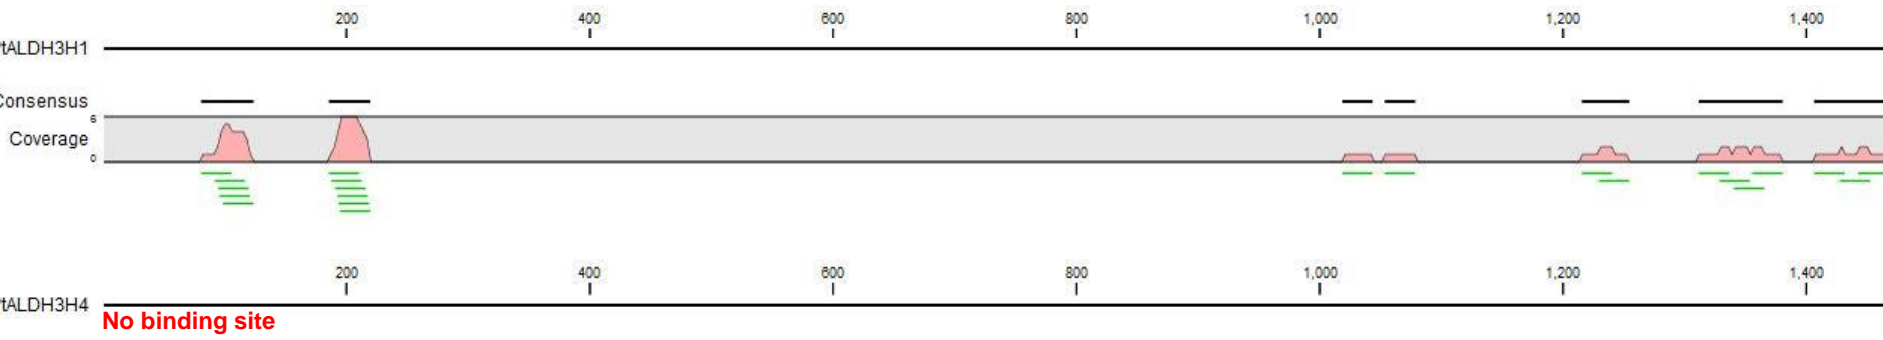

**Probe sets of *PtALDH3H4*:**

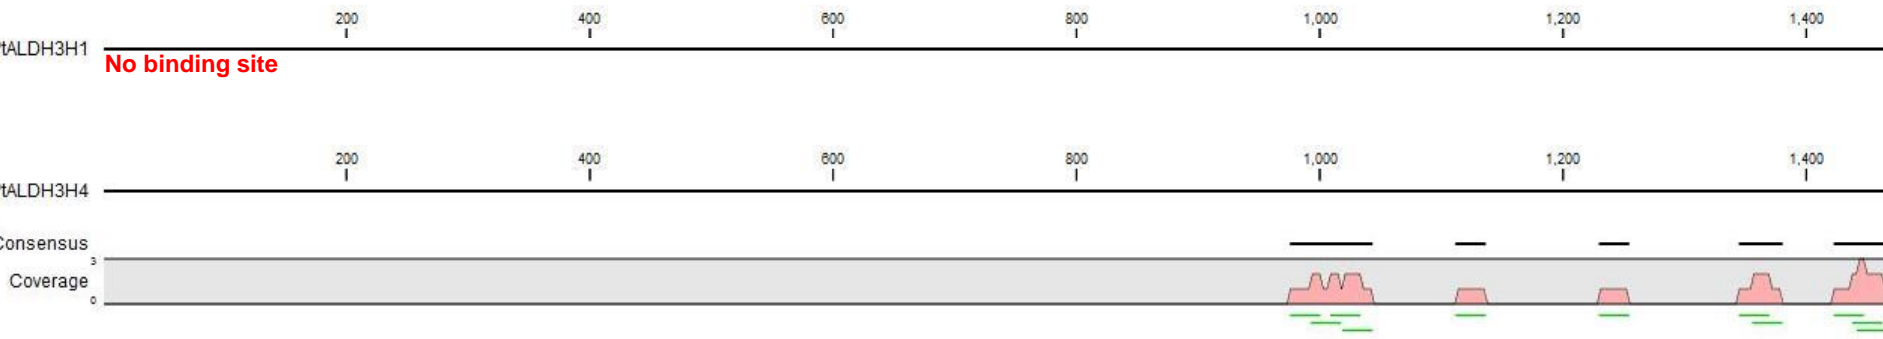

**Probe sets of *PtALDH3H5*:**

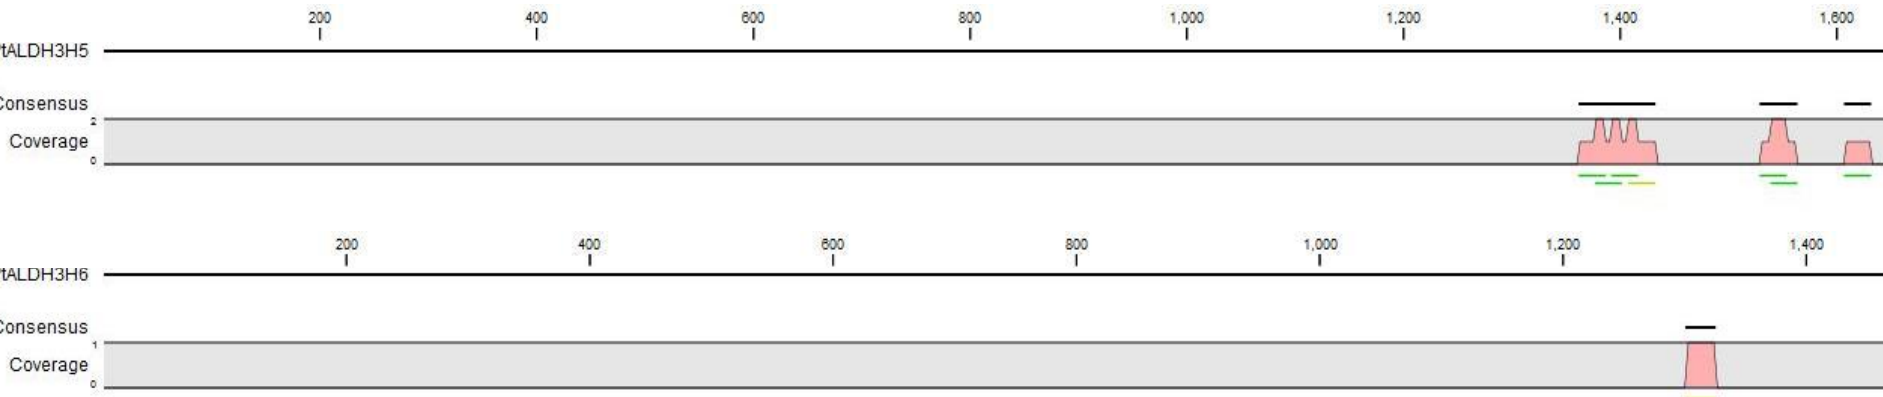

1 nonspecific binding sites

**Probe sets of *PtALDH3H6*:**

No corresponding probe sets

**Probe sets of *PtALDH6B3*:**

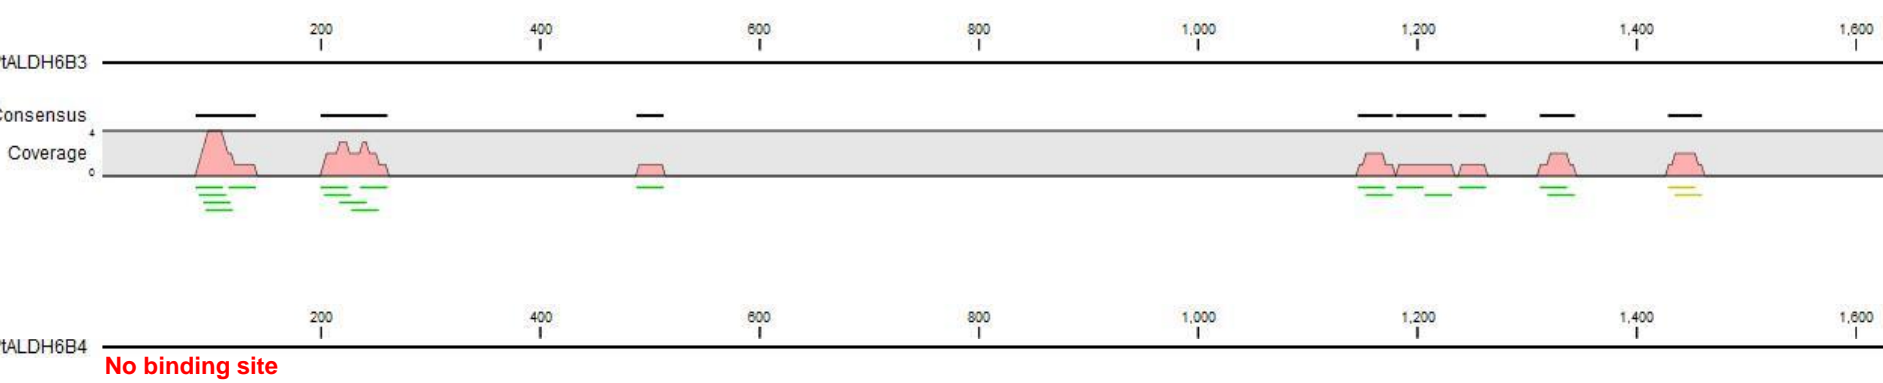

**Probe sets of *PtALDH6B4*:**

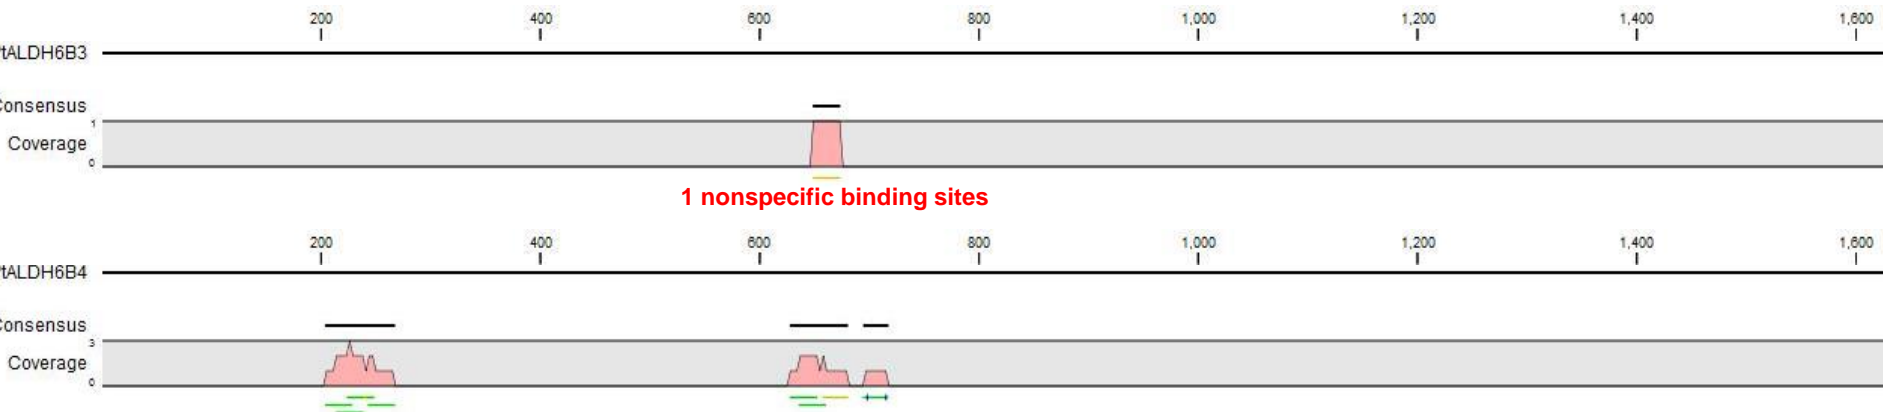

**Probe sets of *PtALDH6B5*:**

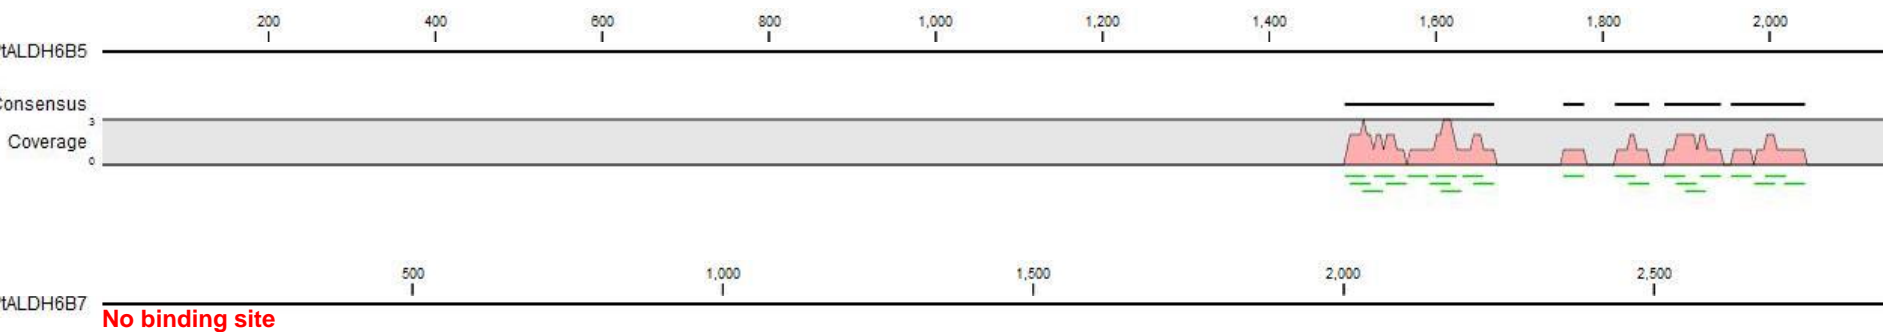

**Probe sets of *PtALDH6B7*:**

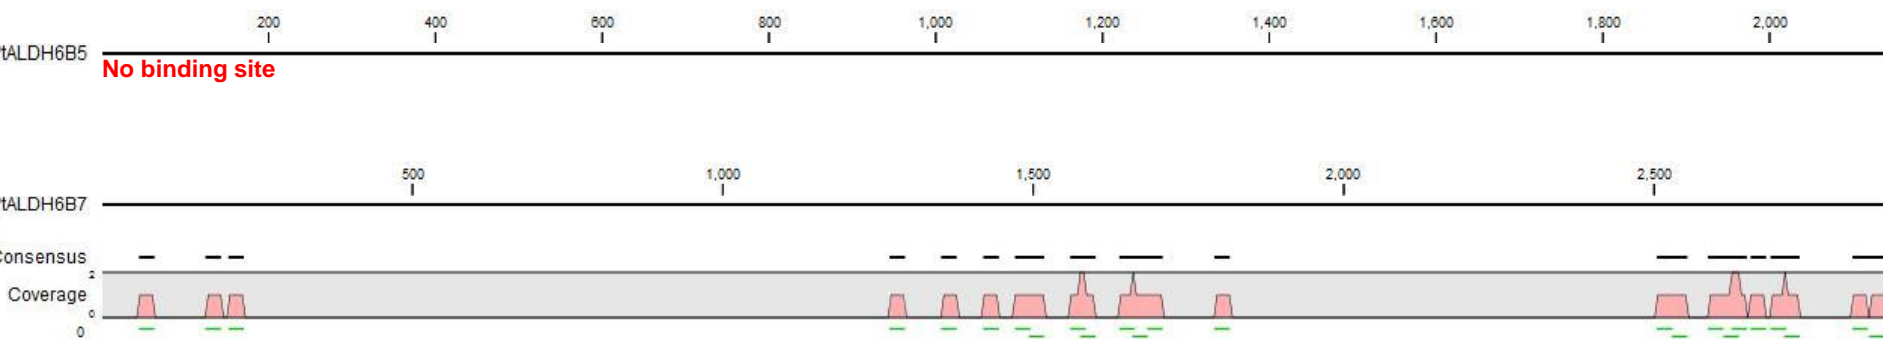

**Probe sets of *PtALDH10A8*:**

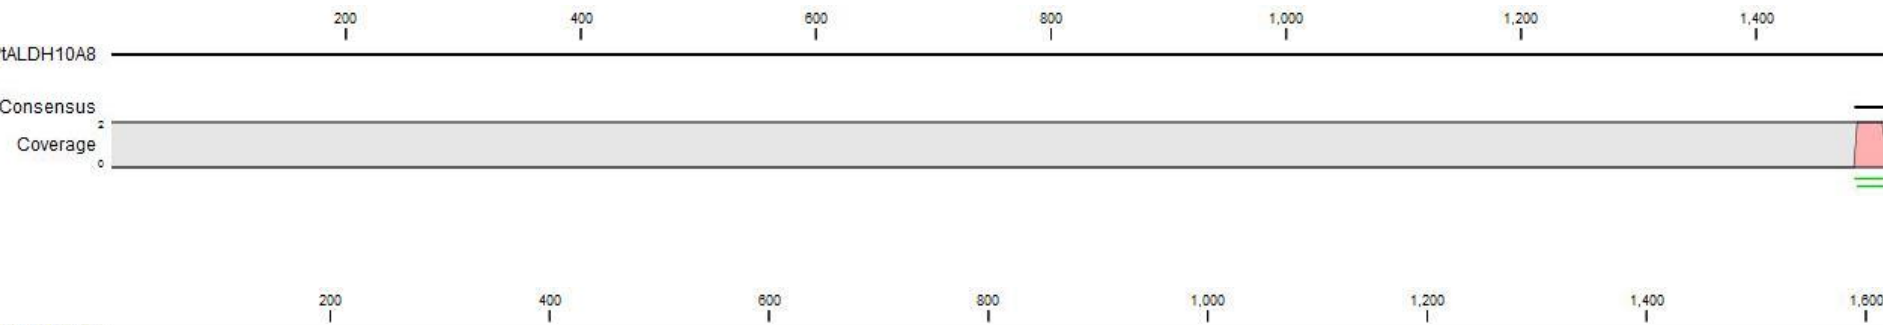

**No binding site**

**Probe sets of *PtALDH10A9*:**

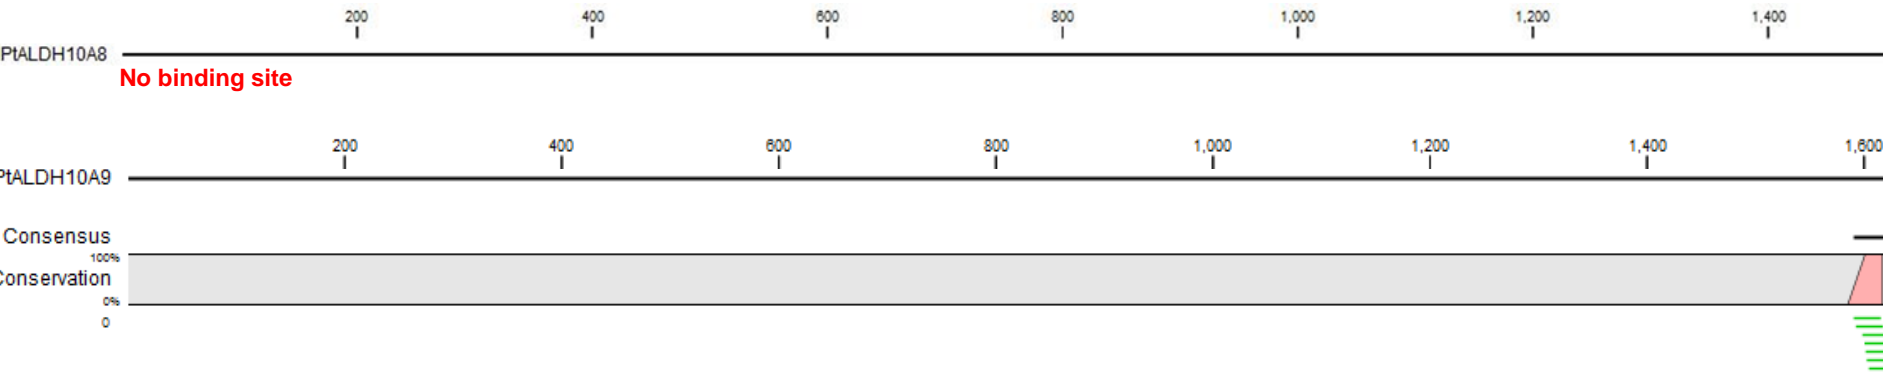

**Probe sets of *PtALDH11A3*:**

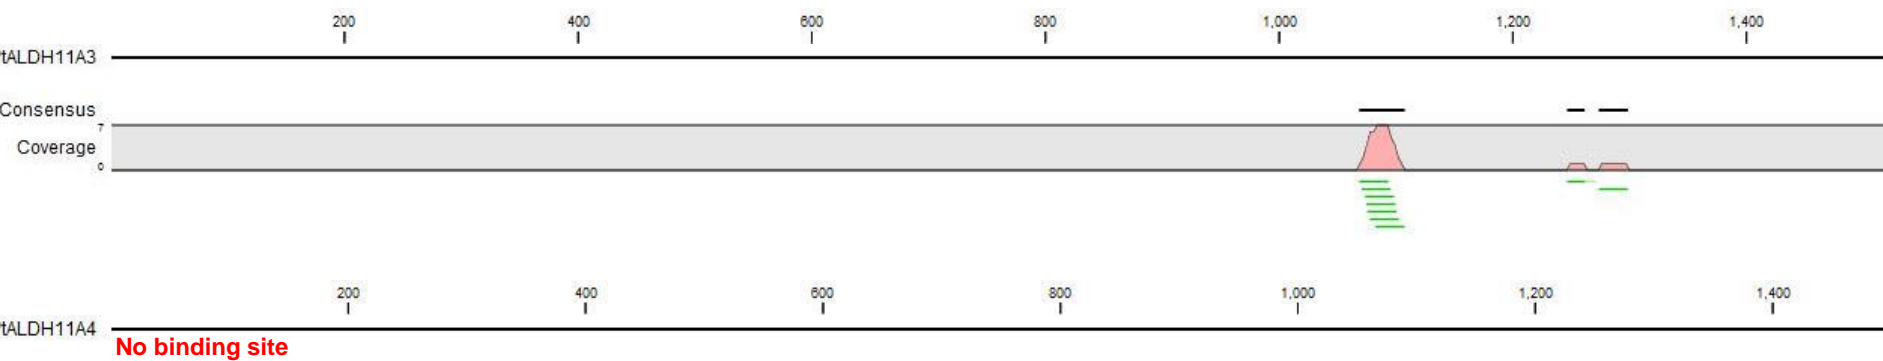

**Probe sets of *PtALDH11A4*:**

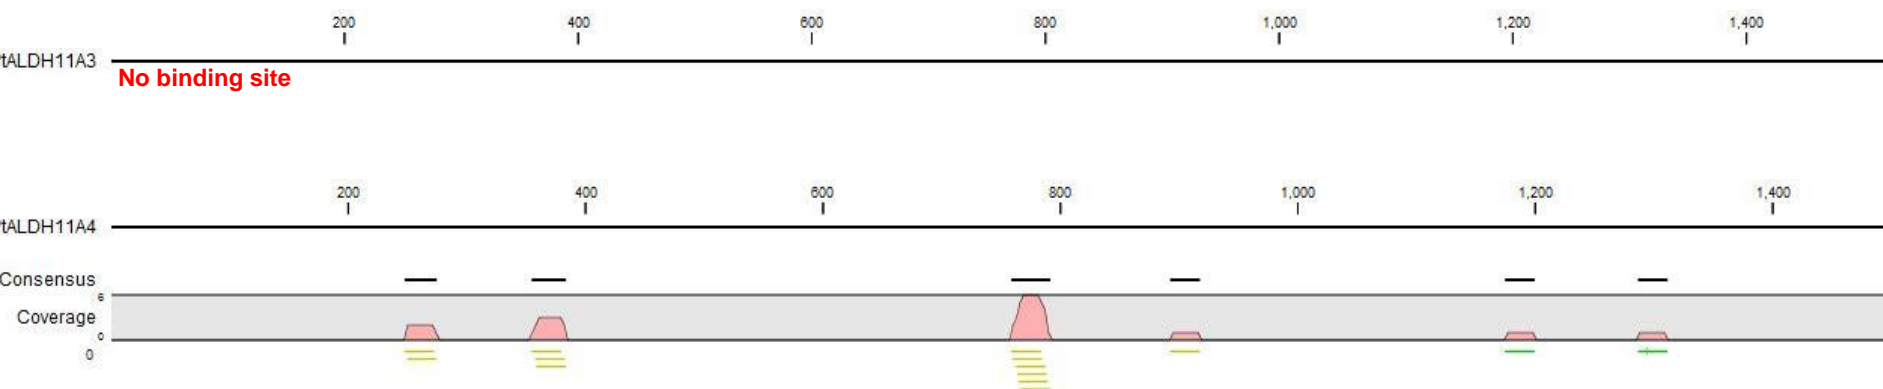

**Probe sets of *PtALDH18B1*:**

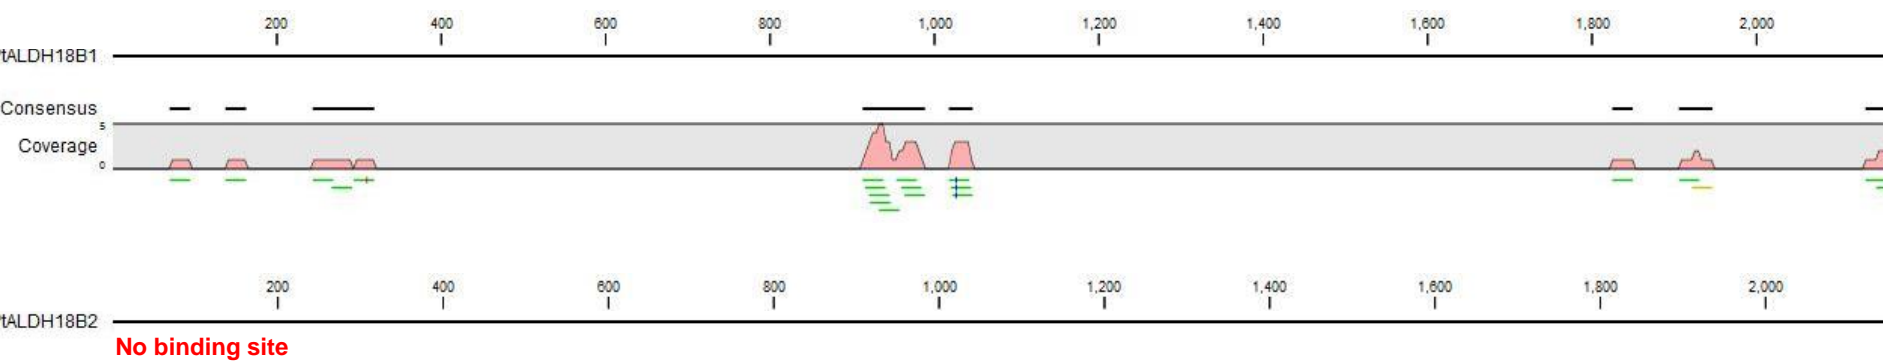

**Probe sets of *PtALDH18B2*:**

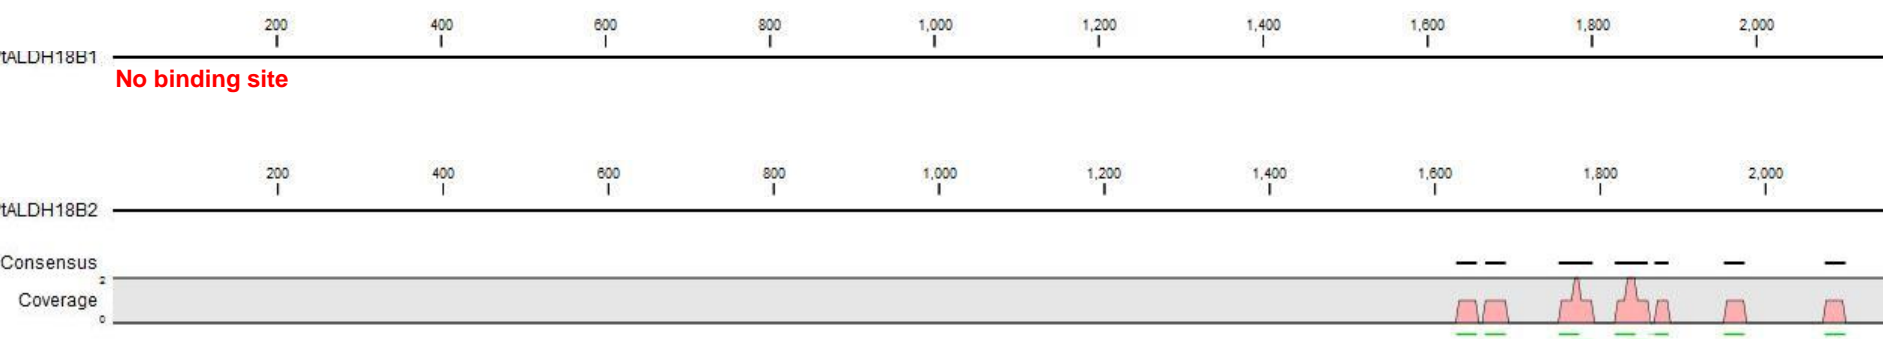

Supplement: pone.0124669.s001.pdf [file pone.0124669.s001.pdf]
